# Supplementary material
Source: PubMed Central journal article supplement (PMC8086238)

## WEB MATERIAL

### Randomized Trial Evaluation of the Benefits and Risks of Menopausal Hormone Therapy Among Women 50-59 Years of Age

Ross L. Prentice, Aaron K. Aragaki, Rowan T. Chlebowski, Jacques E. Rossouw, Garnet L. Anderson, Marcia L. Stefanick, Jean Wactawski-Wende, Lewis H. Kuller, Robert Wallace, Karen C. Johnson, Aladdin H. Shadyab, Margery Gass, and JoAnn E. Manson

#### TABLE OF CONTENTS

##### **Web Appendix 1.** Saturated and Parsimonious Hazard Ratio (Cox) Models

**Web Figure 1.** Flow of participants in the WHI CEE-Alone and CEE+MPA trials through extended follow-up (entire cohort). Participants were postmenopausal and aged 50-79 when enrolled at 40 U.S. clinical centers during 1993-1998.

**Web Figure 2a.** Primary outcomes, other monitored outcomes, and global outcomes in the Women's Health Initiative CEE-alone trial during the intervention phase and cumulative follow-up among participants 60 to 69 years at randomization.

**Web Figure 2b.** Primary outcomes, other monitored outcomes, and global outcomes in the Women's Health Initiative CEE-alone trial during the intervention phase and cumulative follow-up among participants 70 to 79 years at randomization.

**Web Figure 3a.** Primary outcomes, other monitored outcomes, and global outcomes in the Women's Health Initiative CEE+MPA trial during the intervention phase and cumulative follow-up among participants 60 to 69 years at randomization.

**Web Figure 3b.** Primary outcomes, other monitored outcomes, and global outcomes in the Women's Health Initiative CEE+MPA trial during the intervention phase and cumulative follow-up among participants 70 to 79 years at randomization.

**Web Figure 4.** Breakout of hazard ratios (95% CIs) for CEE according to whether gap time from menopause to first use of menopausal hormone therapy is <5 years or ≥5 years, as an extension of the parsimonious hazard ratio analysis of Figure 1.

**Web Figure 5.** Breakout of hazard ratios (95% CIs) for CEE+MPA according to whether gap time from menopause to first use of menopausal hormone therapy is <5 years or ≥5 years, as an extension of the parsimonious hazard ratio analysis of Figure 2.

## Web Appendix 1. Saturated and Parsimonious Hazard Ratio (Cox) Models

Let  $z$ ,  $a_1$ ,  $a_2$ , and  $s$  denote indicator variables for assignment to active hormone treatment, baseline age 60-69 years, baseline age 70-79 years, and inclusion in stratum  $s$ , respectively. The hazard rate for outcome  $k$  at time from randomization  $t$  for a participant having characteristics  $z$ ,  $a_1$ ,  $a_2$ ,  $s$  under the 'saturated' hazard ratio (Cox) model is

$$h_k(t; z, a_1, a_2, s) = h_{ks}(t) \exp(zb_{1k} + za_1b_{2k} + za_2b_{3k}), \text{ for each outcome } k.$$

The corresponding parsimonious hazard rate under the 'parsimonious' model is

$$h_k(t; z, a_1, a_2, s) = h_{ks}(t) \exp(zb_{1k} + za_1b_{2k} + za_2b_{3k}), \text{ for each outcome } k.$$

In these expressions the stratification  $s$  involves cross classification by baseline characteristics of age (50-59, 60-69, 70-79), randomization status in the companion WHI Dietary Modification trial, prior diagnosis of outcome  $k$ , race/ethnicity, prior menopausal hormone therapy use, as well as by (follow-up time-dependent) study phase.

Regression parameters are estimated by partial likelihood, and P-values for the parsimonious model versus the saturated model are based on the partial likelihood ratio test.

**Web Figure 1.** Flow of participants in the WHI CEE-Alone and CEE+MPA trials through extended follow-up (entire cohort). Participants were postmenopausal and aged 50-79 when enrolled at 40 U.S. clinical centers during 1993-1998.

\*Fact of death is known for participants who did not provide consent for extended follow-up.

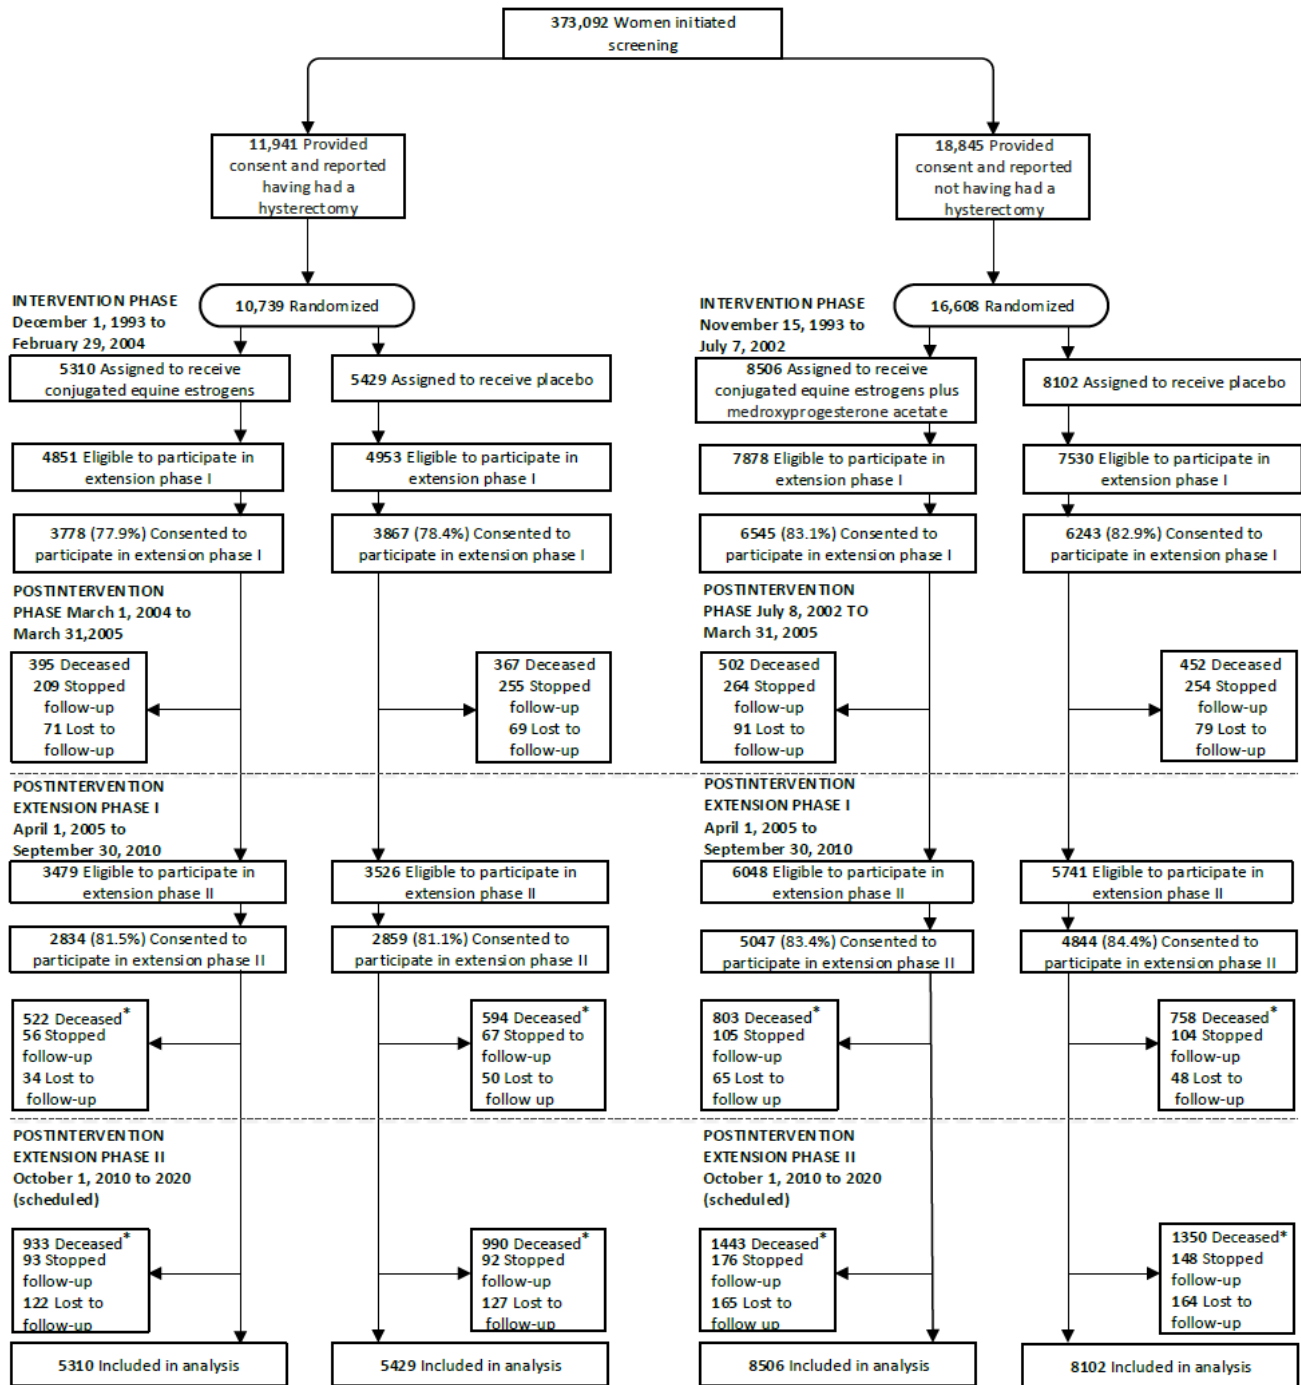

**Web Figure 2a.** Primary outcomes, other monitored outcomes, and global outcomes in the Women's Health Initiative CEE-alone trial during the intervention phase and cumulative follow-up among participants 60 to 69 years at randomization. Statistical models are similar to those described in Figure 1 for 50 to 59y participants in the CEE-alone trial. Participants were postmenopausal and aged 50-79 when enrolled at 40 U.S. clinical centers during 1993-1998.

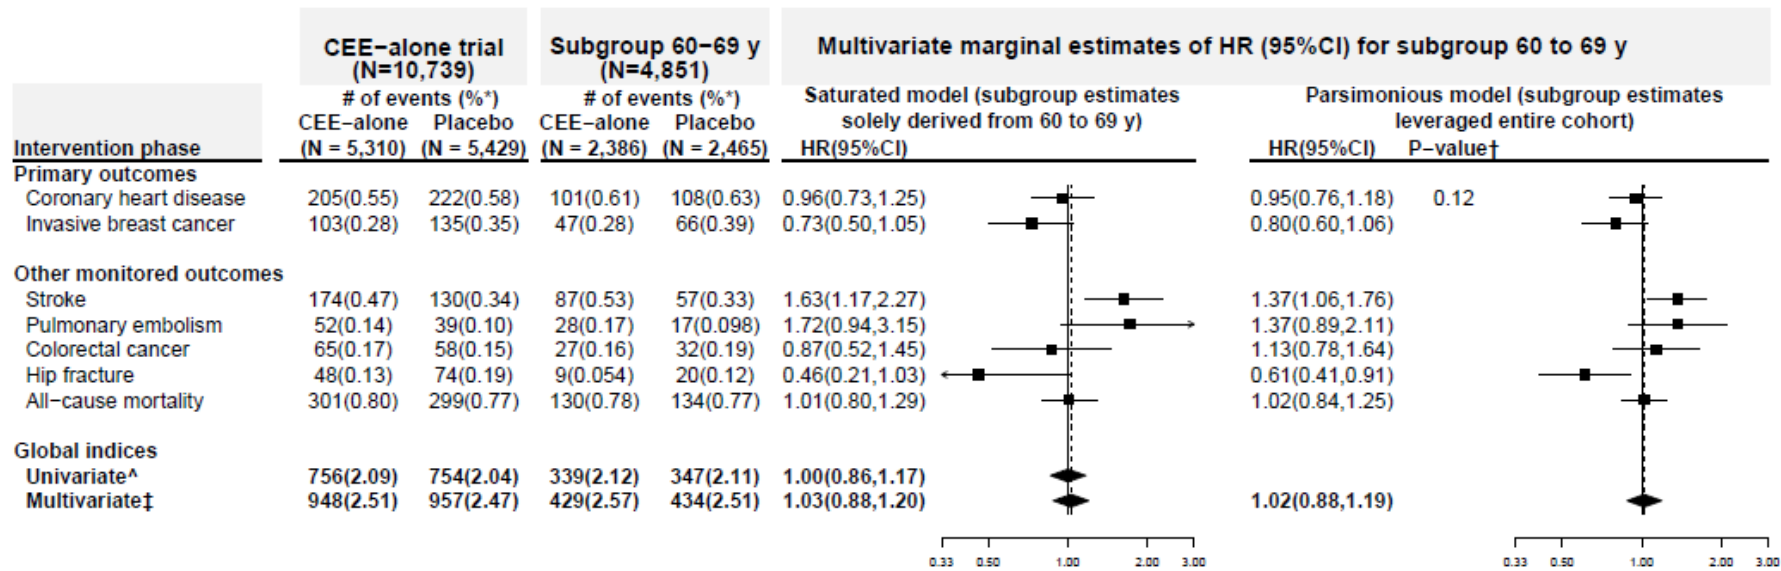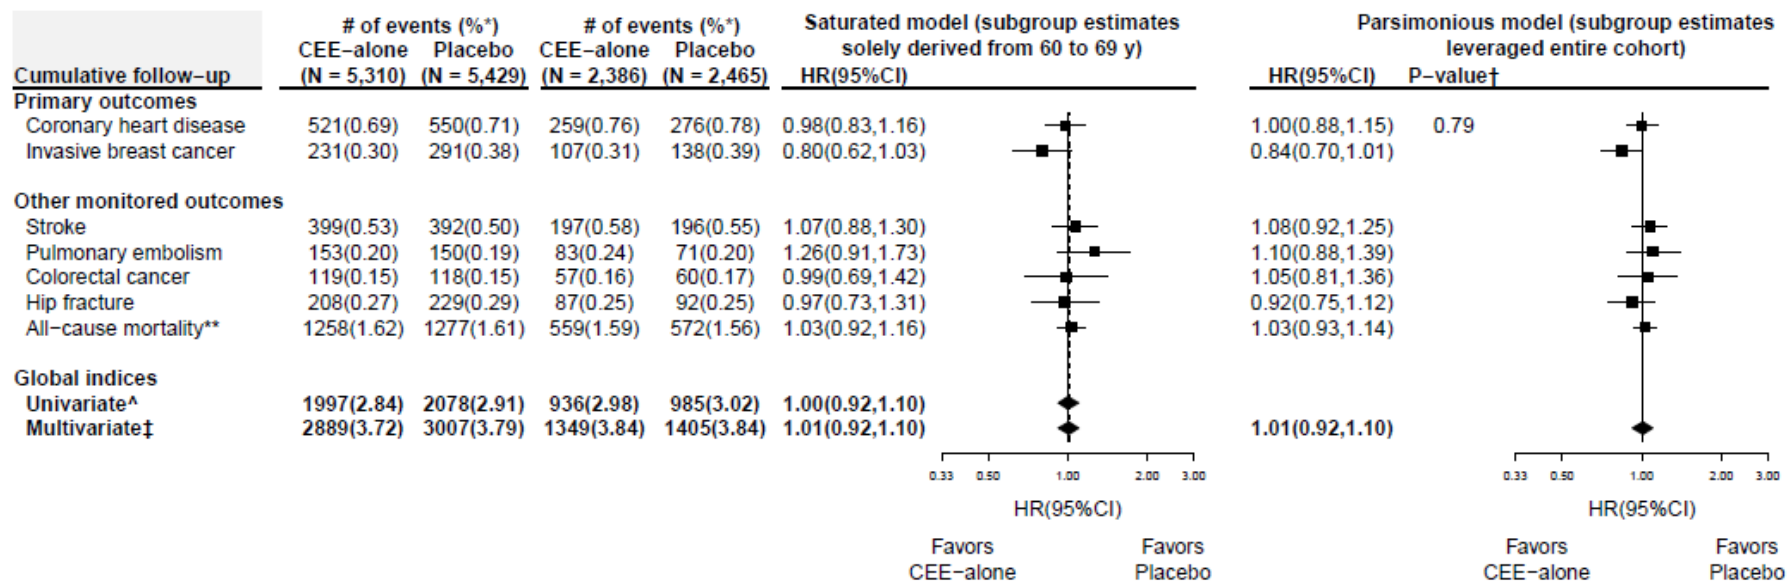

**Web Figure 2b.** Primary outcomes, other monitored outcomes, and global outcomes in the Women's Health Initiative CEE-alone trial during the intervention phase and cumulative follow-up among participants 70 to 79 years at randomization. Statistical models are similar to those described in Figure 1 for 50 to 59y participants in the CEE-alone trial. Participants were postmenopausal and aged 50-79 when enrolled at 40 U.S. clinical centers during 1993-1998.

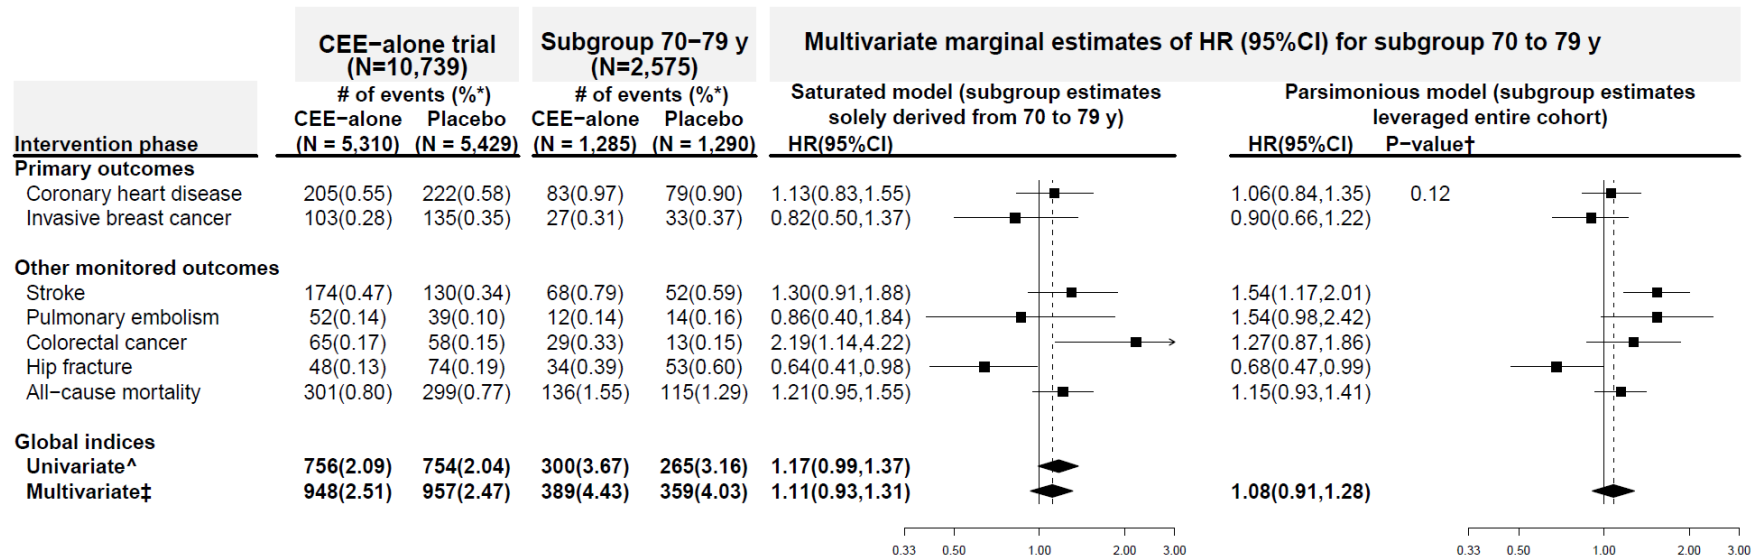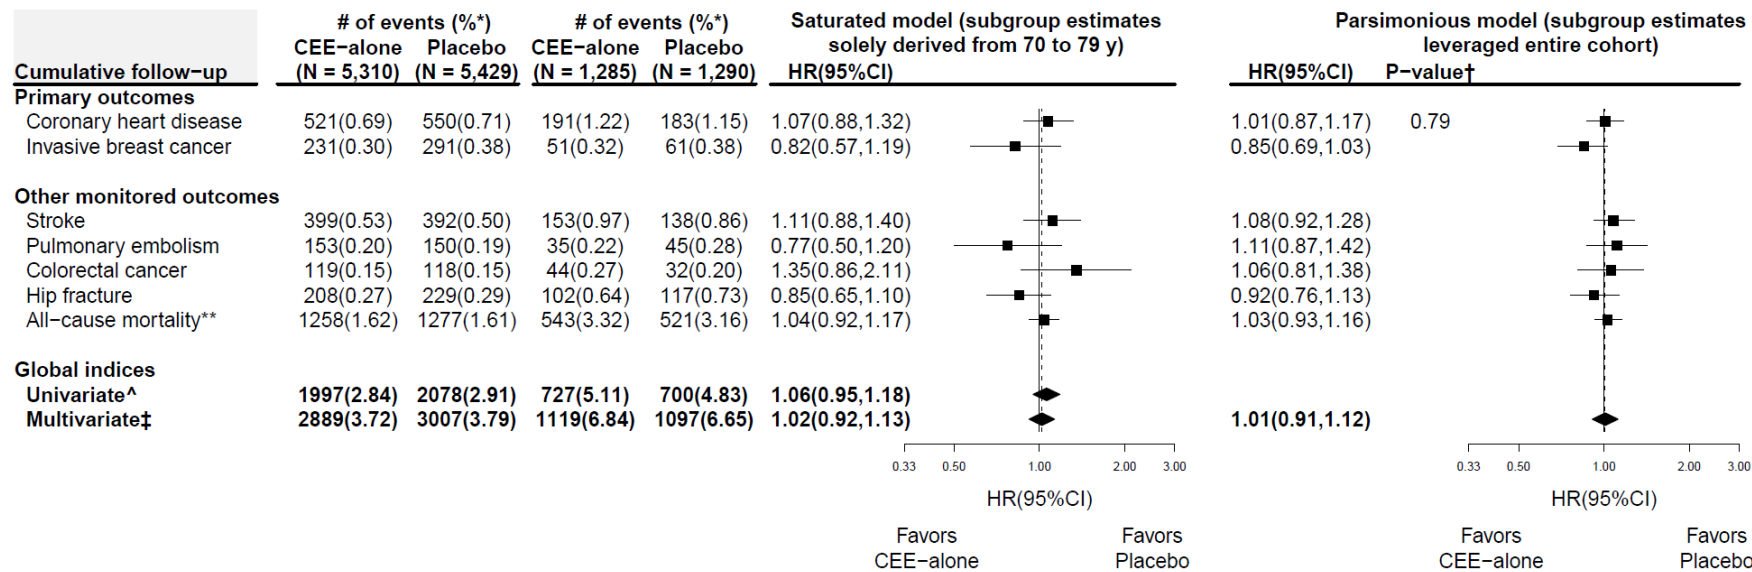



**Web Figure 3a.** Primary outcomes, other monitored outcomes, and global outcomes in the Women's Health Initiative CEE+MPA trial during the intervention phase and cumulative follow-up among participants 60 to 69 years at randomization. Statistical models are similar to those described in Figure 2 for 50 to 59y participants in the CEE+MPA trial. Participants were postmenopausal and aged 50-79 when enrolled at 40 U.S. clinical centers during 1993-1998.

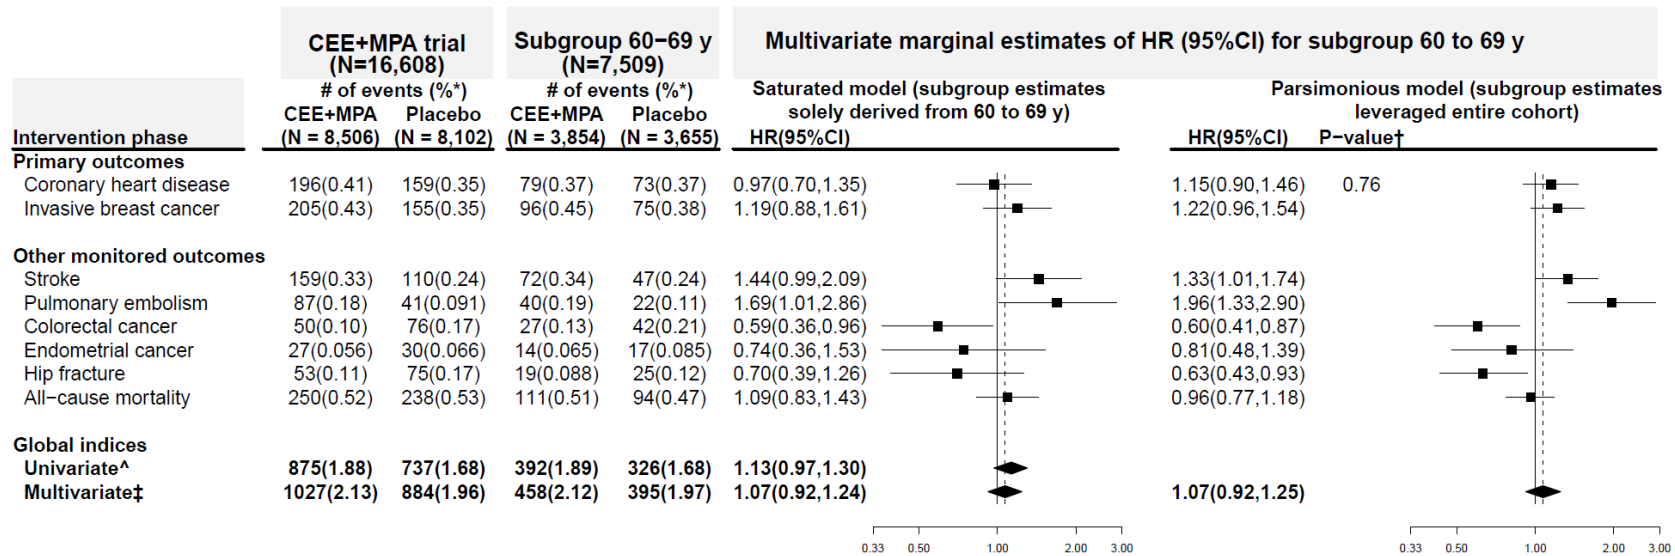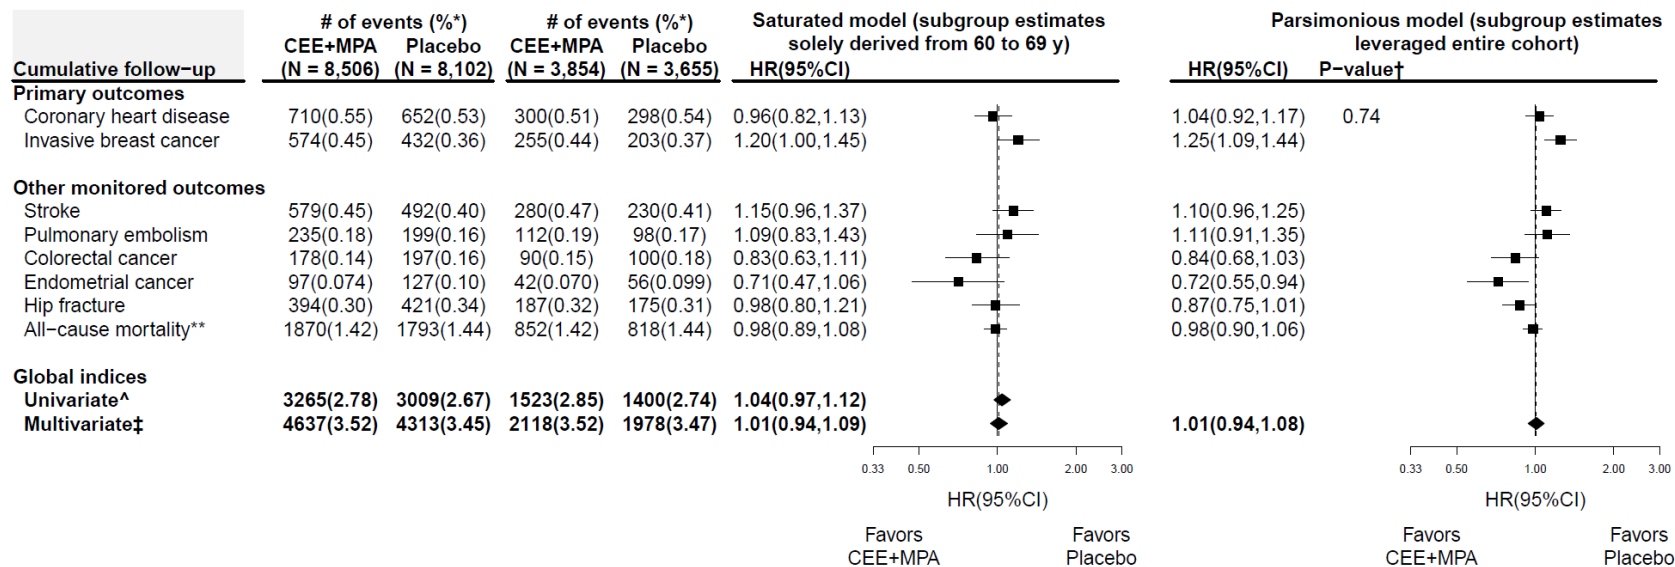

**Web Figure 3b.** Primary outcomes, other monitored outcomes, and global outcomes in the Women's Health Initiative CEE+MPA trial during the intervention phase and cumulative follow-up among participants 70 to 79 years at randomization. Statistical models are similar to those described in Figure 2 for 50 to 59y participants in the CEE+MPA trial. Participants were postmenopausal and aged 50-79 when enrolled at 40 U.S. clinical centers during 1993-1998.

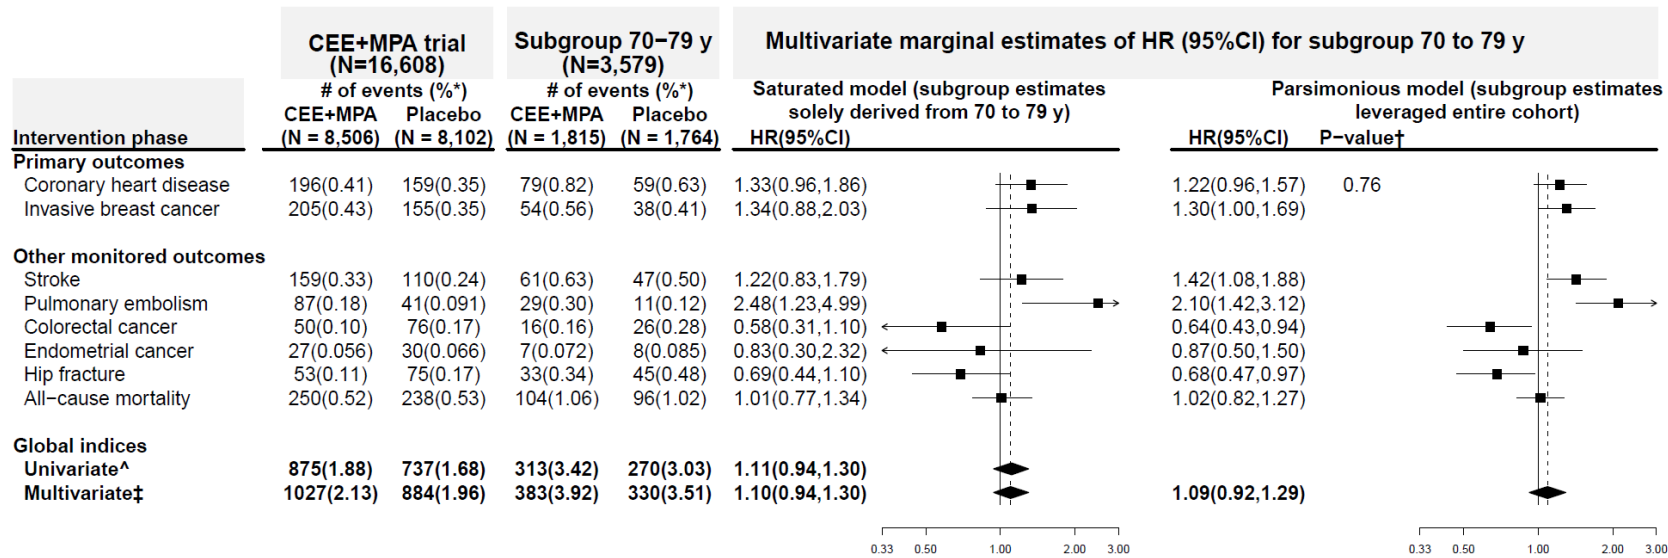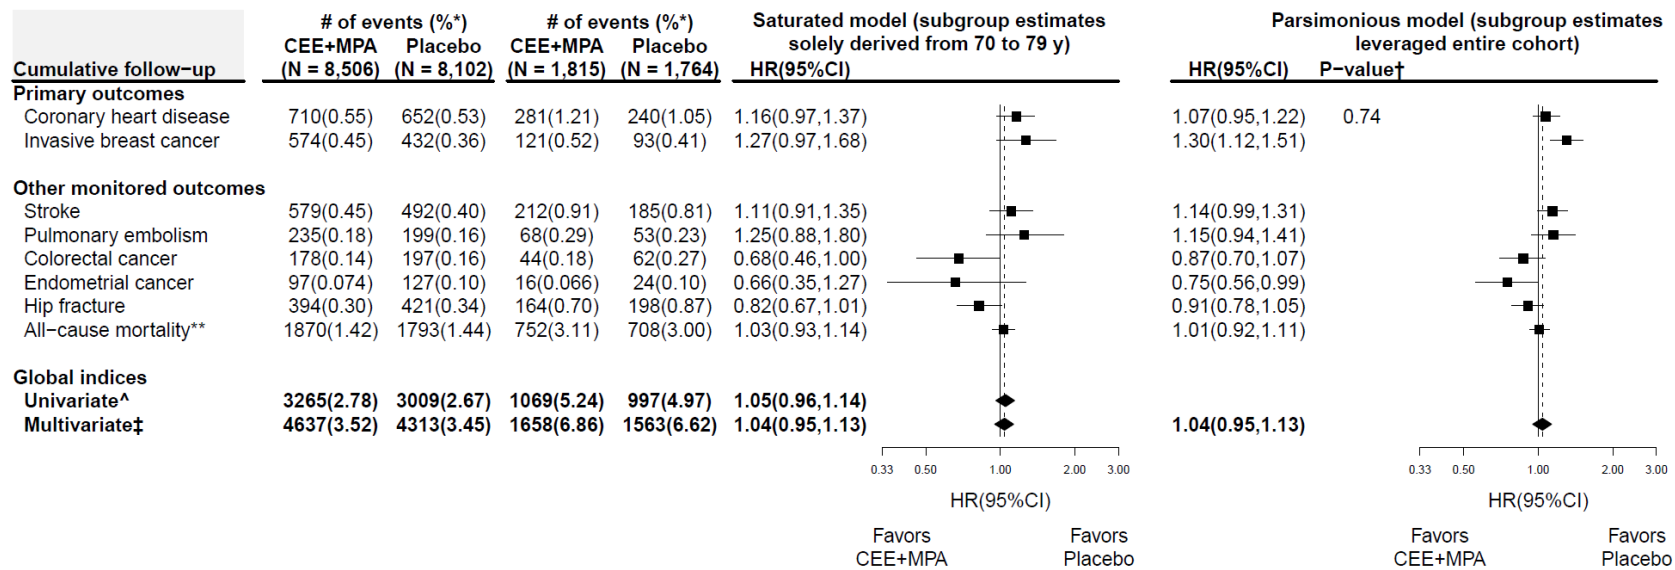

**Web Figure 4.** Breakout of hazard ratios (95% CIs) for CEE according to whether gap time from menopause to first use of menopausal hormone therapy is <5 years or  $\geq 5$  years, as an extension of the parsimonious hazard ratio analysis of Figure 1. Participants were postmenopausal and aged 50-79 when enrolled at 40 U.S. clinical centers during 1993-1998.

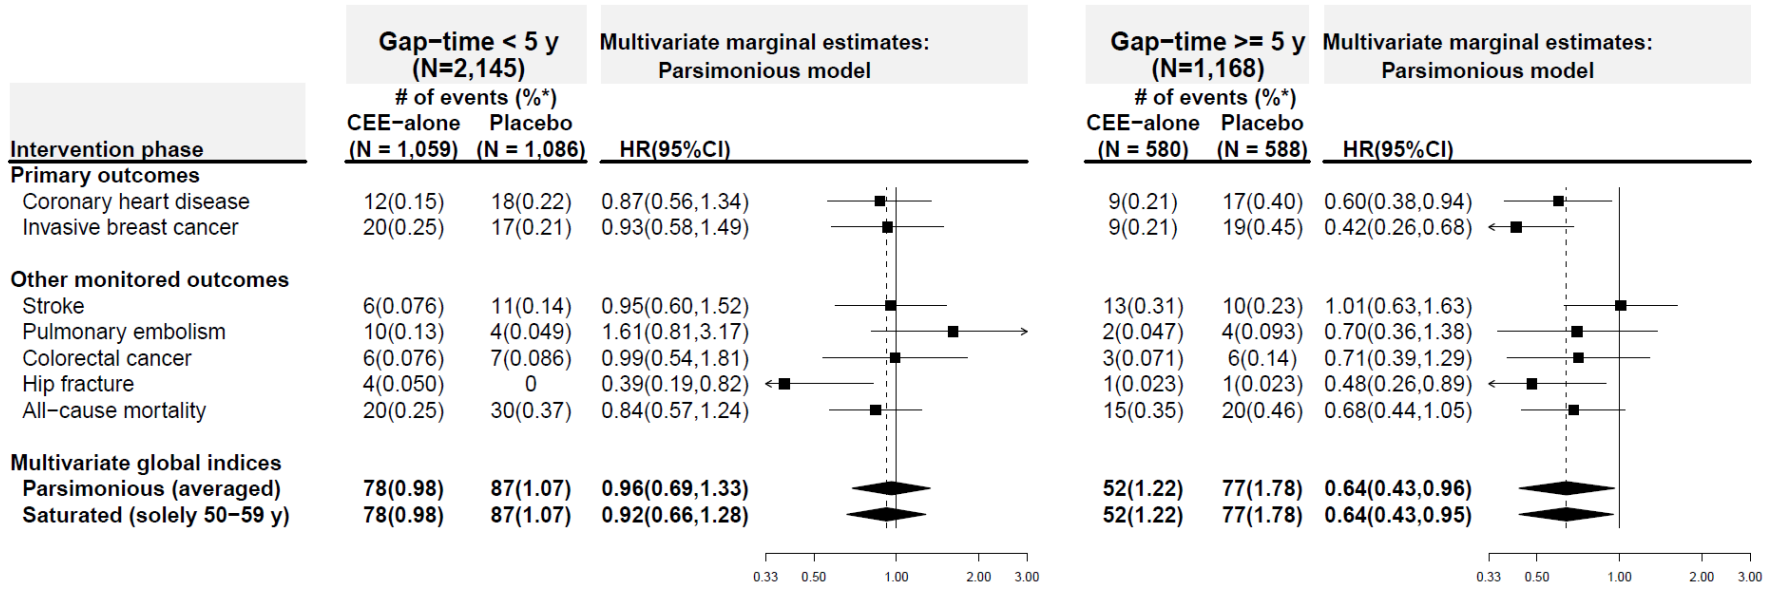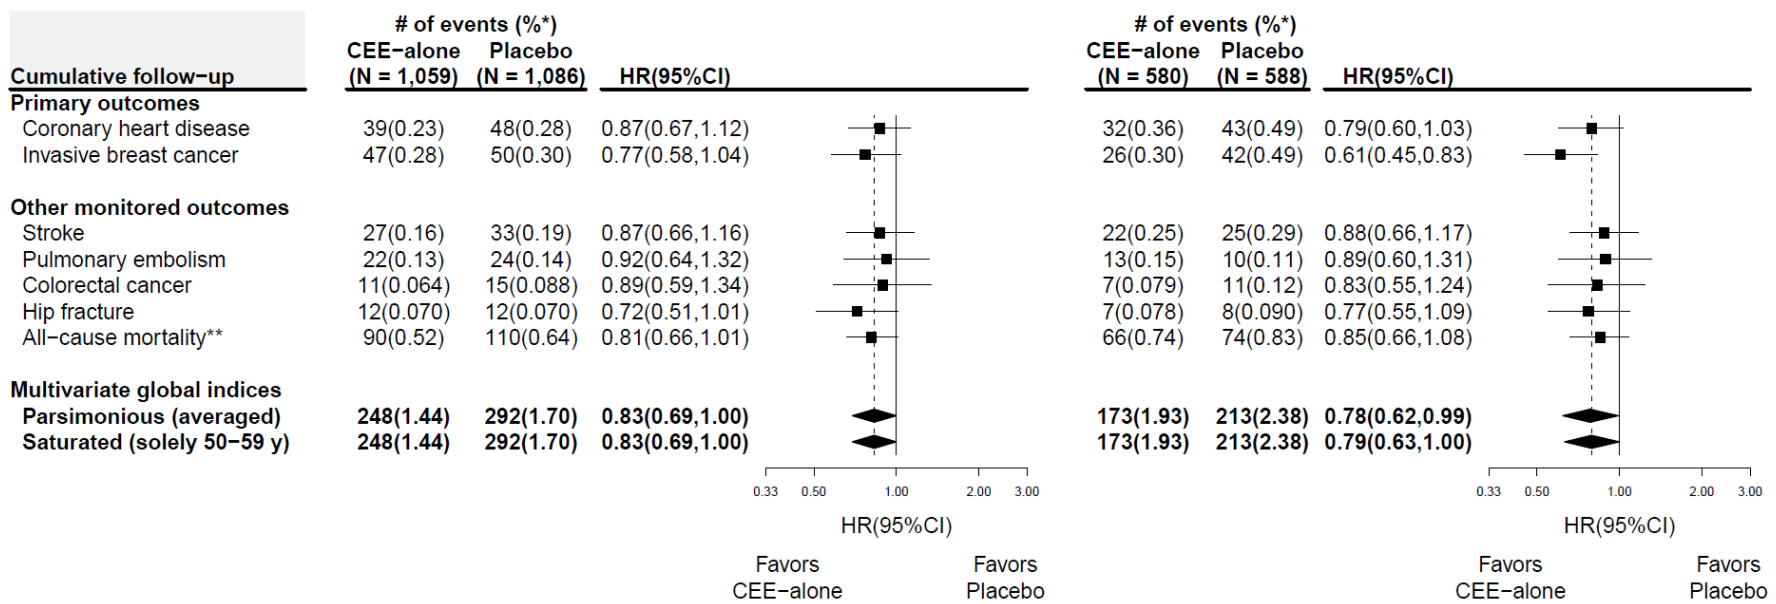

HR(95%CI)

Favors CEE-alone      Favors Placebo

HR(95%CI)

Favors CEE-alone      Favors Placebo

**Web Figure 5.** Breakout of hazard ratios (95% CIs) for CEE+MPA according to whether gap time from menopause to first use of menopausal hormone therapy is <5 years or  $\geq 5$  years, as an extension of the parsimonious hazard ratio analysis of Figure 2. Participants were postmenopausal and aged 50-59 when enrolled at 40 U.S. clinical centers during 1993-1998.

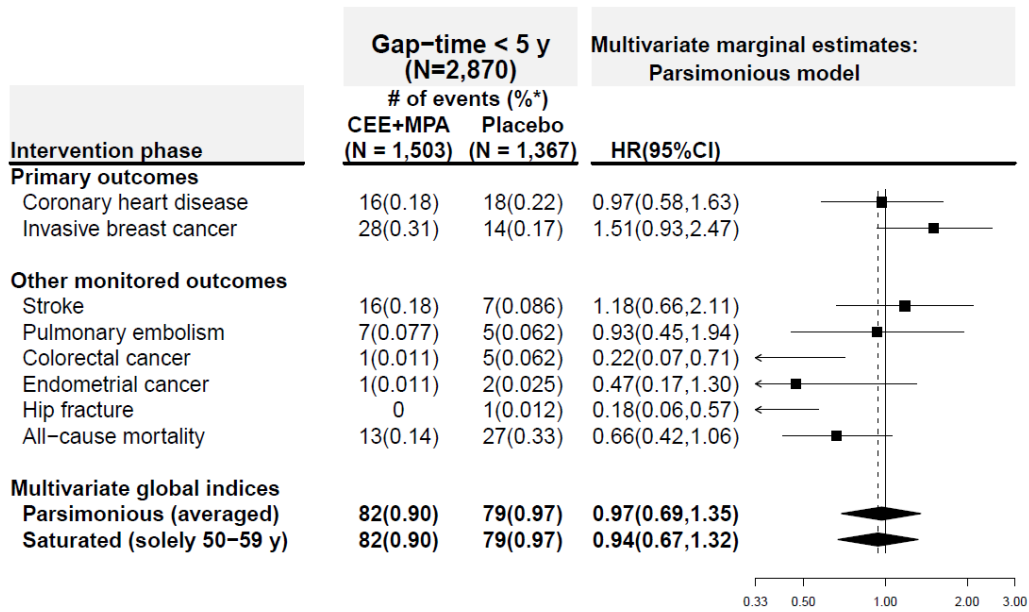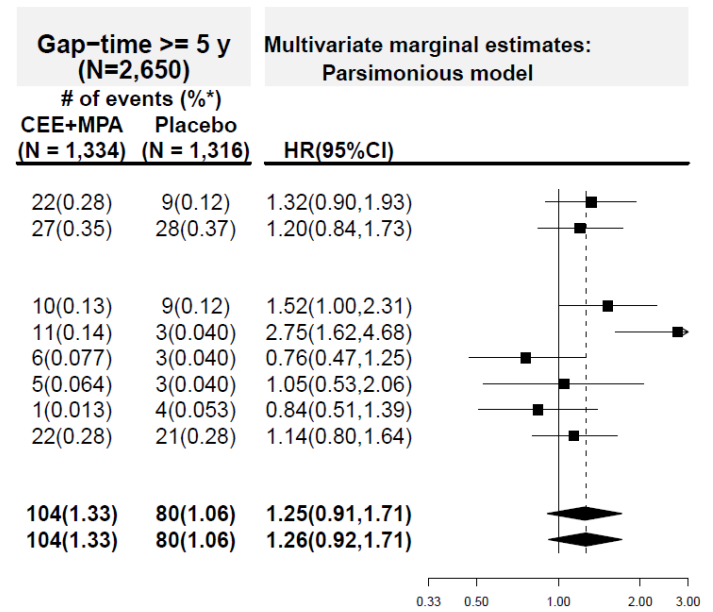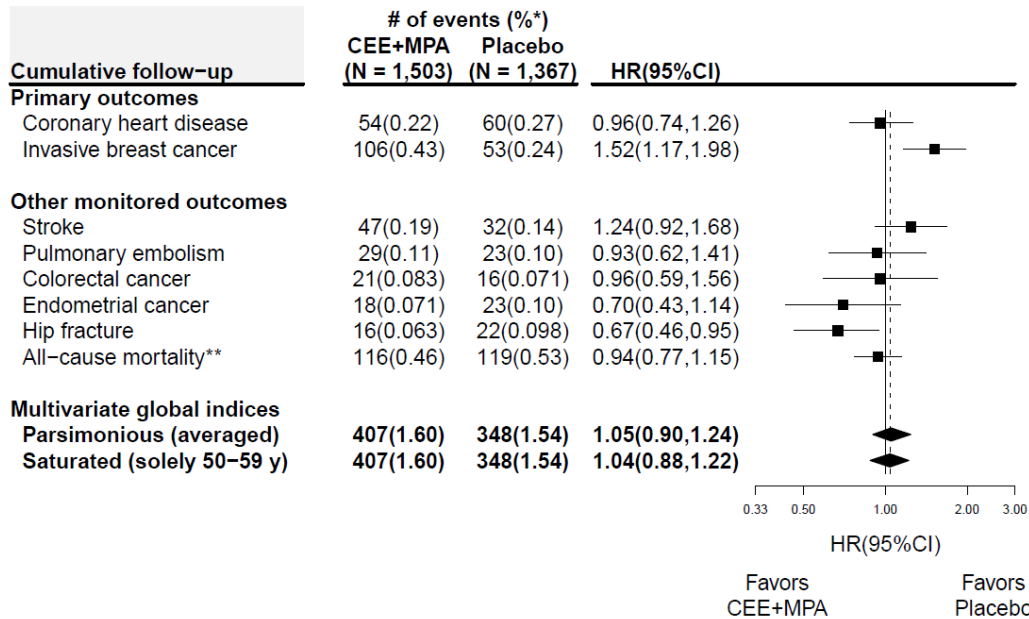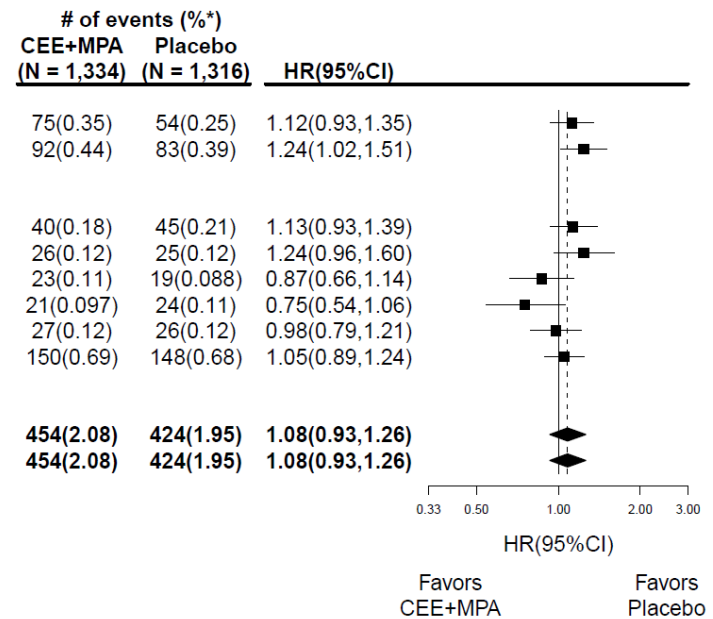

Supplement: web_material_kwaa210.pdf [file web_material_kwaa210.pdf]
